# Supplementary material for: Understanding the functional properties of bio-inorganic nanoflowers as biocatalysts by deciphering the metal-binding sites of enzymes
Source: Royal Society of Chemistry journal article supplement (doi:10.1039/c6tb03295h), 2017-01-01
Supplement: c6tb03295h1.pdf [file c6tb03295h1.pdf]

## Metal-binding sites of proteins drive the formation and affect the functional properties of bio-inorganic nanflowers of lipases.

**Table S1. Predicted normalized scores applying the Frgament Transformation Method to the closed conformation of the lipase from *Thermomyces launiginosus* (TLL).** Values highlighted in blue are the scores that meet the following criteria; residues with score value higher than 2.2 except the cysteine residues involved in disulfide bridges and those residues fully buried (exposed area = 0 Å<sup>2</sup>). The residues highlighted in red are those ones that having scores higher than 2.2 are discarded due to the reason above described. The reasons to discard them (either being a cysteine or the exposed area) are also red colored in the table. The exposed area of each residue was calculated with Bluues server<sup>1</sup>.

| Position | Residue | Exposed area (Å <sup>2</sup> ) | Score Ca <sup>2+</sup> | Score Cu <sup>2+</sup> | Score Zn <sup>2+</sup> |
|----------|---------|--------------------------------|------------------------|------------------------|------------------------|
| 1        | GLU     | 229.1                          | -0.321                 | -0.532                 | -0.343                 |
| 2        | VAL     | 23.22                          | -0.229                 | -0.532                 | -0.343                 |
| 3        | SER     | 122.5                          | -0.473                 | -0.532                 | -0.343                 |
| 4        | GLN     | 186.4                          | 2.926                  | -0.532                 | -0.343                 |
| 5        | ASP     | 193.2                          | 2.926                  | 0.497                  | -0.343                 |
| 6        | LEU     | 61.7                           | -0.516                 | -0.532                 | -0.343                 |
| 7        | PHE     | 53.37                          | -0.473                 | -0.532                 | -0.343                 |
| 8        | ASN     | 161.5                          | 0.558                  | 0.497                  | -0.343                 |
| 9        | GLN     | 60.24                          | -0.19                  | -0.532                 | -0.343                 |
| 10       | PHE     | 0                              | -0.599                 | -0.532                 | -0.343                 |
| 11       | ASN     | 45.62                          | -0.239                 | -0.532                 | -0.343                 |
| 12       | LEU     | 35.77                          | -0.599                 | -0.532                 | -0.343                 |
| 13       | PHE     | 2.888                          | -0.97                  | 0.799                  | -0.343                 |
| 14       | ALA     | 0                              | -0.046                 | -0.532                 | -0.343                 |
| 15       | GLN     | 25.89                          | 0.075                  | -0.532                 | -0.343                 |
| 16       | TYR     | 0                              | -0.046                 | 0.958                  | -0.343                 |
| 17       | SER     | 0                              | -0.443                 | -0.532                 | -0.343                 |
| 18       | ALA     | 4.868                          | -1.629                 | -0.532                 | -0.343                 |
| 19       | ALA     | 0                              | 0.508                  | -0.532                 | -0.343                 |
| 20       | ALA     | 0                              | 0.52                   | -0.532                 | -0.343                 |
| 21       | TYR     | 35.43                          | 0.508                  | 0.899                  | -0.343                 |
| 22       | CYS     | 0                              | -0.644                 | -0.532                 | 3.226                  |
| 23       | GLY     | 41.33                          | 0.508                  | -0.532                 | -0.343                 |
| 24       | LYS     | 212.2                          | 0.2                    | -0.532                 | -0.343                 |
| 25       | ASN     | 0                              | 1.943                  | -0.532                 | -0.343                 |
| 26       | ASN     | 85.96                          | 1.943                  | 1.579                  | -0.343                 |
| 27       | ASP     | 200.5                          | 0.927                  | 1.579                  | -0.343                 |
| 28       | ALA     | 35.45                          | 0.404                  | -0.532                 | -0.343                 |
| 29       | PRO     | 200.5                          | -0.723                 | -0.532                 | -0.343                 |
| 30       | ALA     | 153.1                          | 0.235                  | -0.532                 | -0.343                 |

Supporting Information

|    |            |          |        |              |              |
|----|------------|----------|--------|--------------|--------------|
| 31 | GLY        | 103.9    | 0.235  | -0.532       | -0.343       |
| 32 | THR        | 93.63    | -1.374 | -0.532       | -0.343       |
| 33 | ASN        | 190.8    | 0.235  | -0.532       | -0.343       |
| 34 | ILE        | 0        | -0.022 | -0.532       | -0.343       |
| 35 | THR        | 84.63    | 0.508  | <b>2.518</b> | -0.343       |
| 36 | <b>CYS</b> | 26.57    | -0.718 | <b>2.518</b> | <b>3.226</b> |
| 37 | THR        | 118      | -0.945 | 1.571        | -0.343       |
| 38 | GLY        | 88.87    | -1.132 | -0.532       | -0.343       |
| 39 | ASN        | 248.1    | -0.718 | -0.532       | -0.343       |
| 40 | ALA        | 15.5     | -0.441 | -0.532       | -0.343       |
| 41 | <b>CYS</b> | <b>0</b> | -0.903 | <b>2.518</b> | <b>2.278</b> |
| 42 | PRO        | 77.32    | 0.626  | -0.532       | -0.343       |
| 43 | GLU        | 104.9    | 0.885  | -0.532       | -0.343       |
| 44 | VAL        | 0        | 0.626  | -0.532       | -0.343       |
| 45 | GLU        | 129.3    | 0.626  | -0.532       | -0.343       |
| 46 | LYS        | 316.4    | 0.222  | -0.532       | -0.343       |
| 47 | ALA        | 12.57    | 0.599  | -0.532       | -0.343       |
| 48 | ASP        | 153.4    | 0.885  | -0.532       | -0.343       |
| 49 | ALA        | 0        | 0.885  | -0.532       | -0.343       |
| 50 | THR        | 29.14    | 0.52   | -0.532       | -0.343       |
| 51 | PHE        | 0        | -0.272 | -0.532       | -0.343       |
| 52 | LEU        | 97.23    | -0.724 | -0.532       | -0.343       |
| 53 | TYR        | 119.1    | 0.981  | -0.532       | -0.343       |
| 54 | SER        | 17.32    | -0.339 | -0.532       | -0.343       |
| 55 | PHE        | 7.104    | 0.52   | -0.532       | -0.343       |
| 56 | GLU        | 136.9    | 1.943  | 1.222        | 1.936        |
| 57 | ASP        | 135      | 0.521  | 1.222        | 2.11         |
| 58 | SER        | 43.26    | 0.232  | -0.532       | <b>2.968</b> |
| 59 | GLY        | 66.87    | 0.521  | -0.532       | -0.343       |
| 60 | VAL        | 238.1    | -0.502 | -0.532       | -0.343       |
| 61 | GLY        | 70.23    | 0.416  | 2.18         | -0.343       |
| 62 | ASP        | 152.1    | 0.416  | 2.18         | <b>2.968</b> |
| 63 | VAL        | 5.245    | -0.148 | -0.532       | -0.343       |
| 64 | THR        | 0        | 0.168  | -0.532       | -0.343       |
| 65 | GLY        | 0        | 0.52   | -0.532       | -0.343       |
| 66 | PHE        | 0        | 0.52   | -0.532       | -0.343       |
| 67 | LEU        | 0        | -1.13  | -0.532       | -0.343       |
| 68 | ALA        | 0        | -0.989 | -0.532       | -0.343       |
| 69 | LEU        | 34.52    | -0.272 | -0.532       | -0.343       |
| 70 | ASP        | <b>0</b> | 0.89   | -0.532       | <b>3.387</b> |
| 71 | ASN        | 97.03    | 0.885  | 0.909        | -0.343       |
| 72 | THR        | 186      | 0.89   | -0.532       | -0.343       |
| 73 | ASN        | 134.7    | 0.599  | 0.833        | -0.343       |

Supporting Information

|     |     |       |        |        |        |
|-----|-----|-------|--------|--------|--------|
| 74  | LYS | 213   | 0.885  | 0.833  | -0.343 |
| 75  | LEU | 9.297 | -0.114 | -0.532 | -0.343 |
| 76  | ILE | 0     | -0.989 | -0.532 | -0.343 |
| 77  | VAL | 0     | -1.401 | -0.532 | -0.343 |
| 78  | LEU | 0     | -3.205 | -0.532 | -0.343 |
| 79  | SER | 0     | -0.524 | -0.532 | -0.343 |
| 80  | PHE | 0     | -0.948 | -0.532 | -0.343 |
| 81  | ARG | 23.65 | 0.508  | -0.532 | -0.343 |
| 82  | GLY | 0     | -0.842 | -0.532 | -0.343 |
| 83  | SER | 32.55 | 0.46   | -0.532 | -0.343 |
| 84  | ARG | 321   | -0.62  | -0.532 | -0.343 |
| 85  | SER | 140.3 | 0.46   | -0.532 | -0.343 |
| 86  | ILE | 13.05 | -1.23  | -0.532 | -0.343 |
| 87  | GLU | 244   | 0.225  | -0.532 | -0.343 |
| 88  | ASN | 191.1 | 0.268  | -0.532 | -0.343 |
| 89  | TRP | 64.58 | -0.906 | -0.532 | -0.343 |
| 90  | ILE | 36.18 | -0.975 | -0.532 | -0.343 |
| 91  | GLY | 152.8 | 1.047  | -0.532 | -0.343 |
| 92  | ASN | 238.9 | 0.268  | -0.532 | -0.343 |
| 93  | LEU | 40.96 | 1.047  | -0.532 | -0.343 |
| 94  | ASN | 161.4 | 1.249  | -0.532 | -0.343 |
| 95  | PHE | 94.48 | 1.249  | -0.532 | -0.343 |
| 96  | ASP | 190.2 | 2.297  | -0.532 | 1.989  |
| 97  | LEU | 69.74 | 2.297  | -0.532 | 1.915  |
| 98  | LYS | 124.5 | 1.077  | -0.532 | 1.989  |
| 99  | GLU | 185.1 | 0.931  | -0.532 | -0.343 |
| 100 | ILE | 0     | 0.761  | -0.532 | -0.343 |
| 101 | ASN | 163.9 | 2.802  | 2.457  | -0.343 |
| 102 | ASP | 248.6 | 2.802  | 2.457  | 2.059  |
| 103 | ILE | 34.78 | 0.287  | 2.964  | -0.343 |
| 104 | CYS | 34.49 | -1.619 | 2.964  | 2.327  |
| 105 | SER | 203.5 | -1.335 | -0.532 | -0.343 |
| 106 | GLY | 101.4 | 0.761  | 2.426  | -0.343 |
| 107 | CYS | 2.854 | -0.901 | 2.964  | 2.327  |
| 108 | ARG | 205.8 | 1.773  | -0.532 | -0.343 |
| 109 | GLY | 0     | 1.773  | 3.169  | -0.343 |
| 110 | HIS | 8.445 | -0.201 | 3.169  | 1.907  |
| 111 | ASP | 91.32 | 0.681  | 1.522  | 1.907  |
| 112 | GLY | 58.59 | -0.418 | 0.86   | -0.343 |
| 113 | PHE | 5.702 | -0.198 | -0.532 | -0.343 |
| 114 | THR | 0     | 0.019  | -0.532 | -0.343 |
| 115 | SER | 66.45 | 0.209  | -0.532 | -0.343 |
| 116 | SER | 12.63 | -0.752 | -0.532 | -0.343 |

Supporting Information

|     |     |       |        |        |        |
|-----|-----|-------|--------|--------|--------|
| 117 | TRP | 0     | -0.402 | -0.532 | -0.343 |
| 118 | ARG | 177.7 | 0.159  | -0.532 | -0.343 |
| 119 | SER | 100.8 | 0.159  | -0.532 | -0.343 |
| 120 | VAL | 0     | -0.738 | -0.532 | -0.343 |
| 121 | ALA | 0     | -0.916 | -0.532 | -0.343 |
| 122 | ASP | 228.5 | 0.159  | -0.532 | -0.343 |
| 123 | THR | 112.2 | -0.122 | -0.532 | -0.343 |
| 124 | LEU | 0     | -0.738 | -0.532 | -0.343 |
| 125 | ARG | 153   | -0.217 | -0.532 | -0.343 |
| 126 | GLN | 147.8 | 0.386  | -0.532 | -0.343 |
| 127 | LYS | 102.8 | 0.552  | -0.532 | -0.343 |
| 128 | VAL | 0     | -0.387 | -0.532 | -0.343 |
| 129 | GLU | 128.1 | 1.857  | -0.532 | -0.343 |
| 130 | ASP | 110.7 | 1.857  | -0.532 | 4.549  |
| 131 | ALA | 3.385 | -0.259 | -0.532 | -0.343 |
| 132 | VAL | 51.69 | 0.142  | -0.532 | -0.343 |
| 133 | ARG | 320   | 1.857  | -0.532 | -0.343 |
| 134 | GLU | 222.5 | 1.285  | -0.532 | 4.549  |
| 135 | HIS | 72.08 | -0.692 | 0.909  | 3.387  |
| 136 | PRO | 236.6 | -0.412 | 1.574  | -0.343 |
| 137 | ASP | 190.7 | 0.142  | 1.574  | 3.387  |
| 138 | TYR | 55.29 | 0.142  | -0.532 | -0.343 |
| 139 | ARG | 137.3 | -0.689 | -0.532 | -0.343 |
| 140 | VAL | 4.456 | 0.479  | -0.532 | -0.343 |
| 141 | VAL | 0     | -2.05  | -0.532 | -0.343 |
| 142 | PHE | 0     | -0.84  | -0.532 | -0.343 |
| 143 | THR | 0     | -0.345 | -0.532 | -0.343 |
| 144 | GLY | 0     | -0.732 | -0.532 | -0.343 |
| 145 | HIS | 0     | -0.443 | 2.006  | 2.426  |
| 146 | SER | 0     | 0.321  | 1.253  | -0.343 |
| 147 | LEU | 21.77 | -1.355 | -0.532 | -0.343 |
| 148 | GLY | 0     | -0.842 | -0.532 | -0.343 |
| 149 | GLY | 0     | -0.345 | -0.532 | -0.343 |
| 150 | ALA | 0     | -1.488 | -0.532 | -0.343 |
| 151 | LEU | 0     | -0.255 | -0.532 | -0.343 |
| 152 | ALA | 0     | -1.355 | -0.532 | -0.343 |
| 153 | THR | 1.859 | -1.054 | -0.532 | -0.343 |
| 154 | VAL | 0     | 0.287  | -0.532 | -0.343 |
| 155 | ALA | 0     | -1.147 | -0.532 | -0.343 |
| 156 | GLY | 0     | -0.89  | -0.532 | -0.343 |
| 157 | ALA | 7.246 | -0.921 | 2.577  | -0.343 |
| 158 | ASP | 56.52 | 0.287  | 2.577  | 2.059  |
| 159 | LEU | 0     | 0.16   | -0.532 | -0.343 |

Supporting Information

|     |     |          |        |              |              |
|-----|-----|----------|--------|--------------|--------------|
| 160 | ARG | 26.57    | -0.217 | -0.532       | -0.343       |
| 161 | GLY | 154.2    | -0.289 | -0.532       | -0.343       |
| 162 | ASN | 136.2    | 0.16   | -0.532       | -0.343       |
| 163 | GLY | 176.8    | 0.65   | <b>2.255</b> | -0.343       |
| 164 | TYR | 45.84    | 0.65   | <b>2.255</b> | -0.343       |
| 165 | ASP | 184      | 1.951  | -0.532       | <b>3.074</b> |
| 166 | ILE | 0        | 1.242  | -0.532       | -0.343       |
| 167 | ASP | 31.4     | 1.951  | -0.532       | <b>3.074</b> |
| 168 | VAL | 0        | 0.675  | -0.532       | -0.343       |
| 169 | PHE | 0        | -1.35  | -0.532       | -0.343       |
| 170 | SER | 0        | -0.345 | -0.532       | -0.343       |
| 171 | TYR | 0        | -0.97  | 1.33         | -0.343       |
| 172 | GLY | 0        | -1.024 | -0.532       | -0.343       |
| 173 | ALA | 1.859    | -0.842 | 1.54         | -0.343       |
| 174 | PRO | 2.415    | -1.184 | -0.532       | -0.343       |
| 175 | ARG | 5.55     | -1.292 | -0.532       | 1.957        |
| 176 | VAL | 8.253    | -0.825 | 0.712        | -0.343       |
| 177 | GLY | 0        | 1.773  | 0.86         | -0.343       |
| 178 | ASN | 45.84    | 1.773  | -0.532       | -0.343       |
| 179 | ARG | 253.2    | -1.304 | -0.532       | -0.343       |
| 180 | ALA | 70.53    | -0.576 | -0.532       | -0.343       |
| 181 | PHE | 0        | -0.442 | -0.532       | -0.343       |
| 182 | ALA | 3.385    | -0.386 | -0.532       | -0.343       |
| 183 | GLU | 128.8    | -0.386 | -0.532       | -0.343       |
| 184 | PHE | 108.9    | -1.264 | 1.391        | -0.343       |
| 185 | LEU | 12.11    | -1.806 | -0.532       | -0.343       |
| 186 | THR | 98.02    | 0.132  | -0.532       | -0.343       |
| 187 | VAL | 215      | -1.04  | -0.532       | -0.343       |
| 188 | GLN | 31.12    | -0.355 | -0.532       | -0.343       |
| 189 | THR | 256.1    | 0.81   | -0.532       | -0.343       |
| 190 | GLY | 41.92    | -0.044 | -0.532       | -0.343       |
| 191 | GLY | 40.68    | 0.479  | -0.532       | -0.343       |
| 192 | THR | 144      | 0.675  | -0.532       | -0.343       |
| 193 | LEU | 16.42    | 0.675  | -0.532       | -0.343       |
| 194 | TYR | 55.05    | -0.966 | 0.799        | -0.343       |
| 195 | ARG | 11.96    | -1.015 | -0.532       | -0.343       |
| 196 | ILE | 0        | -3.205 | -0.532       | -0.343       |
| 197 | THR | <b>0</b> | 1.161  | -0.532       | <b>3.636</b> |
| 198 | HIS | <b>0</b> | 1.161  | 1.8          | <b>3.636</b> |
| 199 | THR | 41.16    | 0.804  | -0.532       | -0.343       |
| 200 | ASN | 79.96    | 0.804  | 1.102        | -0.343       |
| 201 | ASP | 0        | 0.793  | -0.532       | <b>2.426</b> |
| 202 | ILE | 53.11    | 0.793  | -0.532       | -0.343       |

Supporting Information

|     |     |       |        |        |        |
|-----|-----|-------|--------|--------|--------|
| 203 | VAL | 0     | -0.609 | 1.54   | -0.343 |
| 204 | PRO | 0     | -0.622 | -0.532 | -0.343 |
| 205 | ARG | 47.95 | -0.738 | -0.532 | -0.343 |
| 206 | LEU | 39.22 | -1.199 | -0.532 | -0.343 |
| 207 | PRO | 0     | -1.292 | -0.532 | -0.343 |
| 208 | PRO | 60.08 | -0.539 | -0.532 | -0.343 |
| 209 | ARG | 192.4 | 0.368  | 0.451  | -0.343 |
| 210 | GLU | 322.2 | 0.368  | -0.532 | 1.957  |
| 211 | PHE | 235.1 | -1.14  | 1.288  | -0.343 |
| 212 | GLY | 77.24 | -0.583 | 2.616  | -0.343 |
| 213 | TYR | 0     | -0.391 | 2.616  | -0.343 |
| 214 | SER | 2.415 | 0.132  | 1.152  | -0.343 |
| 215 | HIS | 10.2  | 0.235  | 1.288  | -0.343 |
| 216 | SER | 3.307 | 0.289  | -0.532 | -0.343 |
| 217 | SER | 13.57 | 0.132  | -0.532 | -0.343 |
| 218 | PRO | 44.22 | -1.548 | -0.532 | -0.343 |
| 219 | GLU | 0     | 0.289  | -0.532 | -0.343 |
| 220 | TYR | 19.58 | -1.458 | -0.532 | -0.343 |
| 221 | TRP | 93.28 | 0.12   | -0.532 | -0.343 |
| 222 | ILE | 0     | -1.17  | -0.532 | -0.343 |
| 223 | LYS | 194.5 | 0.361  | -0.532 | -0.343 |
| 224 | SER | 24.36 | 0.361  | -0.532 | -0.343 |
| 225 | GLY | 54.08 | -1.093 | -0.532 | -0.343 |
| 226 | THR | 82.24 | -0.276 | -0.532 | -0.343 |
| 227 | LEU | 263.7 | -1.497 | -0.532 | -0.343 |
| 228 | VAL | 139.6 | -1.143 | -0.532 | -0.343 |
| 229 | PRO | 218   | -0.378 | -0.532 | -0.343 |
| 230 | VAL | 19.8  | -0.557 | -0.532 | -0.343 |
| 231 | THR | 136.6 | 0.017  | -0.532 | -0.343 |
| 232 | ARG | 213.4 | 0.017  | -0.532 | -0.343 |
| 233 | ASN | 167.1 | 0.202  | -0.532 | -0.343 |
| 234 | ASP | 60.38 | 0.202  | -0.532 | -0.343 |
| 235 | ILE | 0     | 0.202  | -0.532 | -0.343 |
| 236 | VAL | 67.28 | 0.202  | -0.532 | -0.343 |
| 237 | LYS | 197.5 | 0.534  | -0.532 | -0.343 |
| 238 | ILE | 36.16 | -0.176 | -0.532 | -0.343 |
| 239 | GLU | 253.5 | 0.534  | -0.532 | -0.343 |
| 240 | GLY | 68.74 | 0.853  | -0.532 | -0.343 |
| 241 | ILE | 69.59 | 0.853  | -0.532 | -0.343 |
| 242 | ASP | 31.28 | 0.853  | -0.532 | -0.343 |
| 243 | ALA | 38.4  | 0.098  | -0.532 | -0.343 |
| 244 | THR | 211.7 | 0.289  | -0.532 | -0.343 |
| 245 | GLY | 70.51 | -0.206 | -0.532 | -0.343 |

*Supporting Information*

|     |     |       |              |        |              |
|-----|-----|-------|--------------|--------|--------------|
| 246 | GLY | 0     | 0.057        | 1.404  | -0.343       |
| 247 | ASN | 0     | 0.26         | 1.404  | -0.343       |
| 248 | ASN | 38.16 | 0.26         | -0.532 | -0.343       |
| 249 | GLN | 100.3 | 0.314        | -0.532 | -0.343       |
| 250 | PRO | 273.8 | -0.226       | -0.532 | -0.343       |
| 251 | ASN | 154.2 | 0.804        | -0.532 | -0.343       |
| 252 | ILE | 329.1 | 0.804        | -0.532 | -0.343       |
| 253 | PRO | 90.24 | -0.622       | 0.782  | -0.343       |
| 254 | ASP | 99.75 | <b>2.283</b> | 0.86   | -0.343       |
| 255 | ILE | 93.2  | <b>2.283</b> | -0.532 | -0.343       |
| 256 | PRO | 135.3 | 1.317        | -0.532 | -0.343       |
| 257 | ALA | 0     | 0.453        | 1.998  | -0.343       |
| 258 | HIS | 0     | 0.321        | 1.998  | -0.343       |
| 259 | LEU | 81.8  | 1.317        | 0.701  | -0.343       |
| 260 | TRP | 62.8  | -1.093       | 1.8    | -0.343       |
| 261 | TYR | 4.831 | 0.075        | 2.006  | -0.343       |
| 262 | PHE | 42.4  | 0.075        | 1.8    | -0.343       |
| 263 | GLY | 32.23 | 0.075        | -0.532 | -0.343       |
| 264 | LEU | 65.8  | -1.132       | -0.532 | -0.343       |
| 265 | ILE | 0     | -3.205       | -0.532 | -0.343       |
| 266 | GLY | 19.32 | -0.842       | 0.987  | -0.343       |
| 267 | THR | 100.6 | -1.657       | 1.571  | -0.343       |
| 268 | CYS | 114.2 | -1.699       | 1.571  | <b>3.226</b> |
| 269 | LEU | 362.4 | -0.945       | 1.34   | -0.343       |

## Supporting Information

**Table S2.** Mineralisation Parameters of zinc-phosphate NFs using different Zn salts and different concentrations of metallic salts and sodium chloride.

| Metallic Salt / (mM)           | NaCl (mM) | Hybrid Biomineral dry weight <sup>a</sup> (mg) | Entrapment Yield <sup>b</sup> (%) | Protein load <sup>b</sup> ( $\text{mg}_{\text{protein}}/\text{mg}_{\text{material}}$ ) | Ae ( $\text{U}/\text{mg}_{\text{protein}}$ ) <sup>c</sup> |
|--------------------------------|-----------|------------------------------------------------|-----------------------------------|----------------------------------------------------------------------------------------|-----------------------------------------------------------|
| $\text{Zn}(\text{COO})_2 / 17$ | 150       | 12.6                                           | 69                                | 0.27                                                                                   | 50.7                                                      |
| $\text{ZnCl}_2 / 17$           | 150       | 15.2                                           | 73                                | 0.24                                                                                   | 9.9                                                       |
| $\text{Zn}(\text{COO})_2 / 80$ | 150       | 18                                             | 80                                | 0.22                                                                                   | 11.3                                                      |
| $\text{Zn}(\text{COO})_2 / 17$ | 8         | 7.4                                            | 50                                | 0.33                                                                                   | 7.4                                                       |

a) Hybrid biomineral dry weight was determined after drying the material at 80°C. b) Entrapment yield (%) means the percentage of offered protein incorporated into the hybrid biomineral. c) Ae: Specific activity in  $\text{IU} \times \text{mg}^{-1}$  of protein.

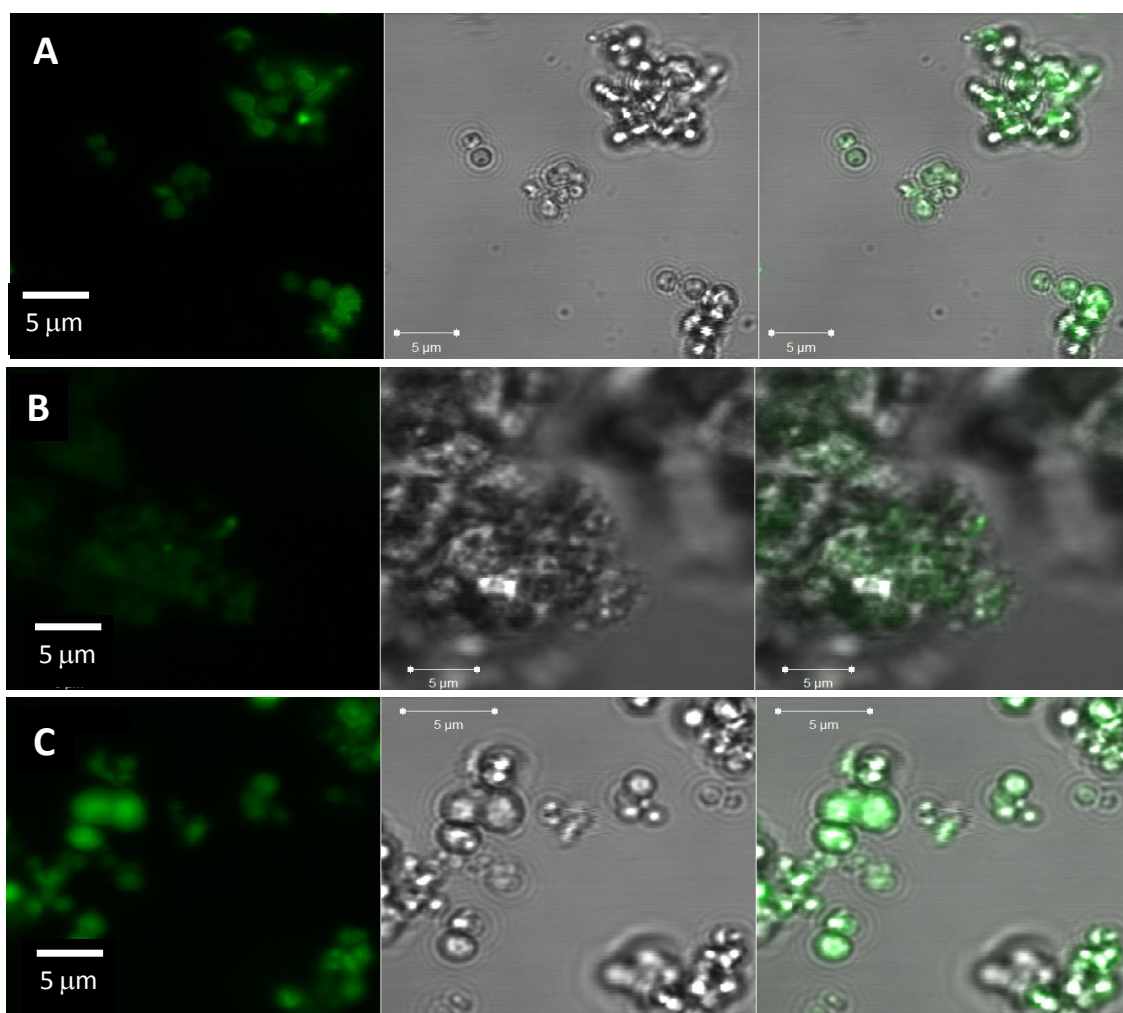

**Figure S1.** Confocal Laser scanning microscopy of different NFs made with fluoresceine-labelled TLL and (A)  $\text{Zn}(\text{CH}_3\text{COO})_2$ , (B)  $\text{CaCl}_2$  and (C)  $\text{CuSO}_4$  in presence of saline phosphate buffer. The right column displays the fluoresceine fluorescence, the central column displays the brightfield and the left column is the overlay of both fluorescence and brightfield signals.



Supporting Information

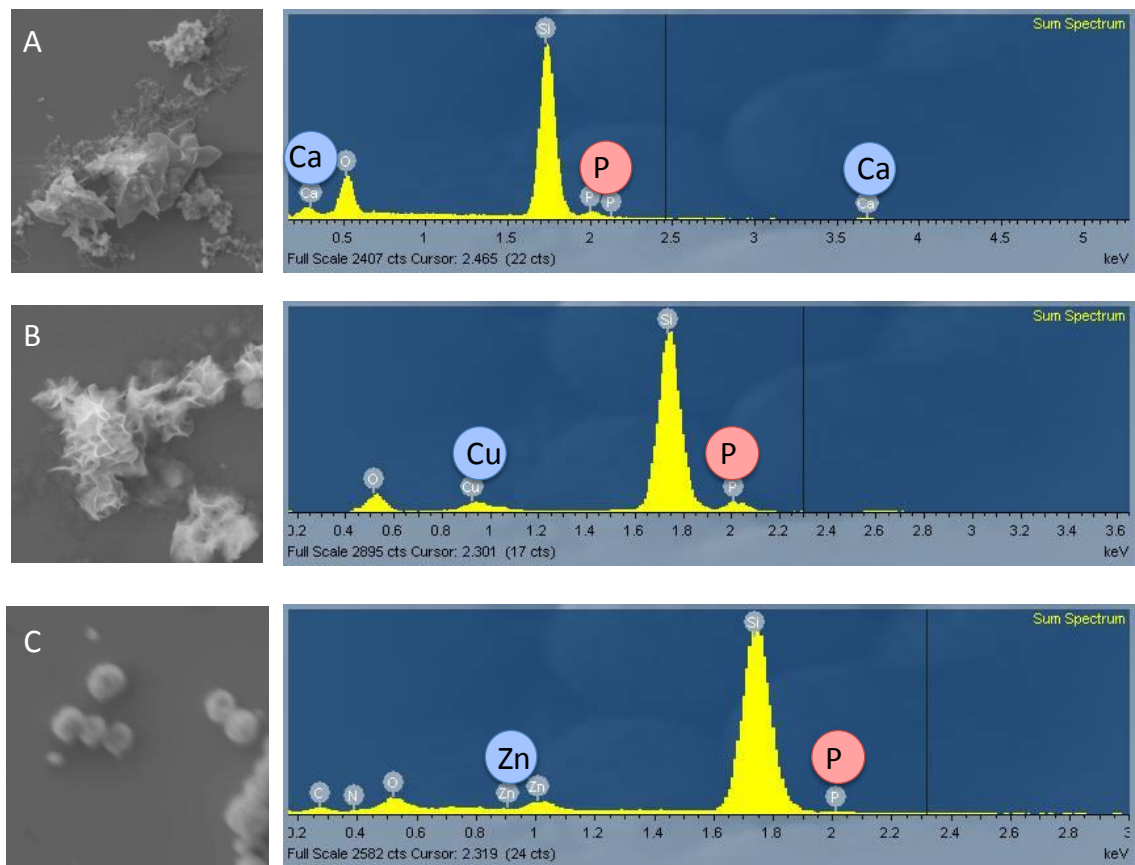

**Figure S2.** SEM-EDX images of different NFs made with TLL and (A)  $\text{Zn}(\text{CH}_3\text{COO})_2$ , (B)  $\text{CaCl}_2$  and (C)  $\text{CuSO}_4$  in presence of saline phosphate buffer. The left column is the SEM images and the right column are the total EDX spectrum of the SEM images.

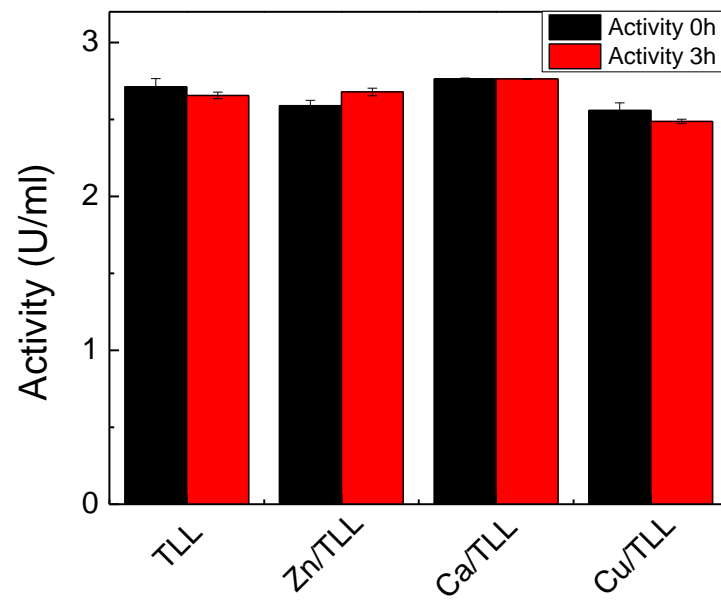

Figure S3. Activity to soluble enzyme with and without different metal salt under the biomining conditions but in buffer 25 mM Tris-H at pH 7 at 25°C

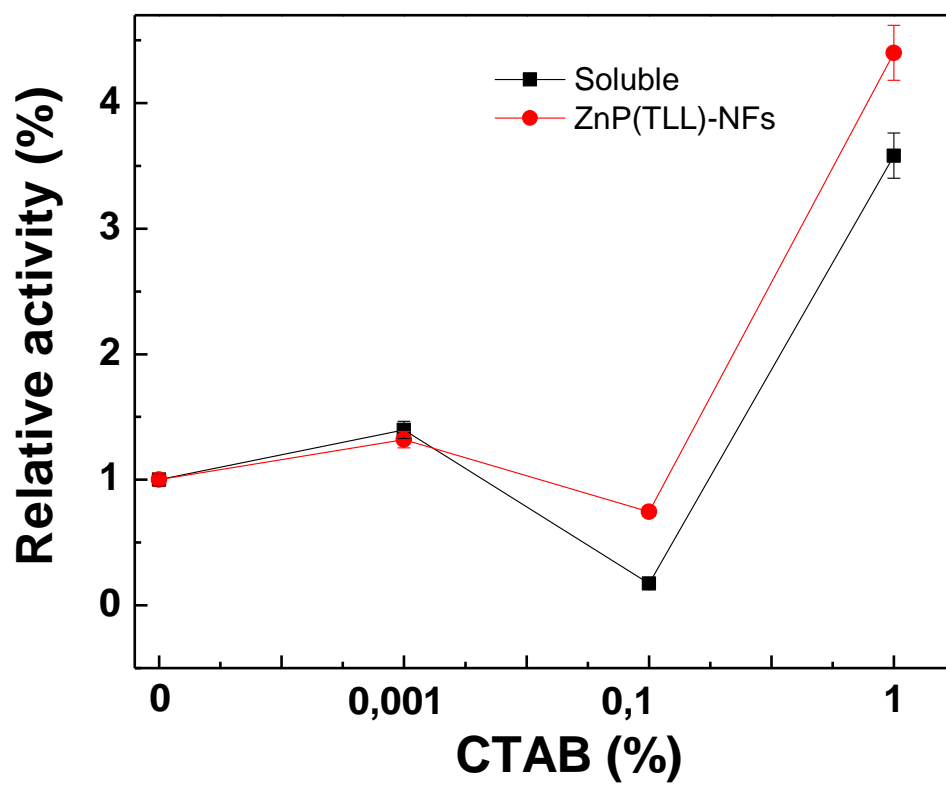

**Figure S4.** Hyperactivation profile of soluble TLL and different TLL-NFs in presence of CTAB. The activity was measured with p-NPB at 25° C and pH 7.

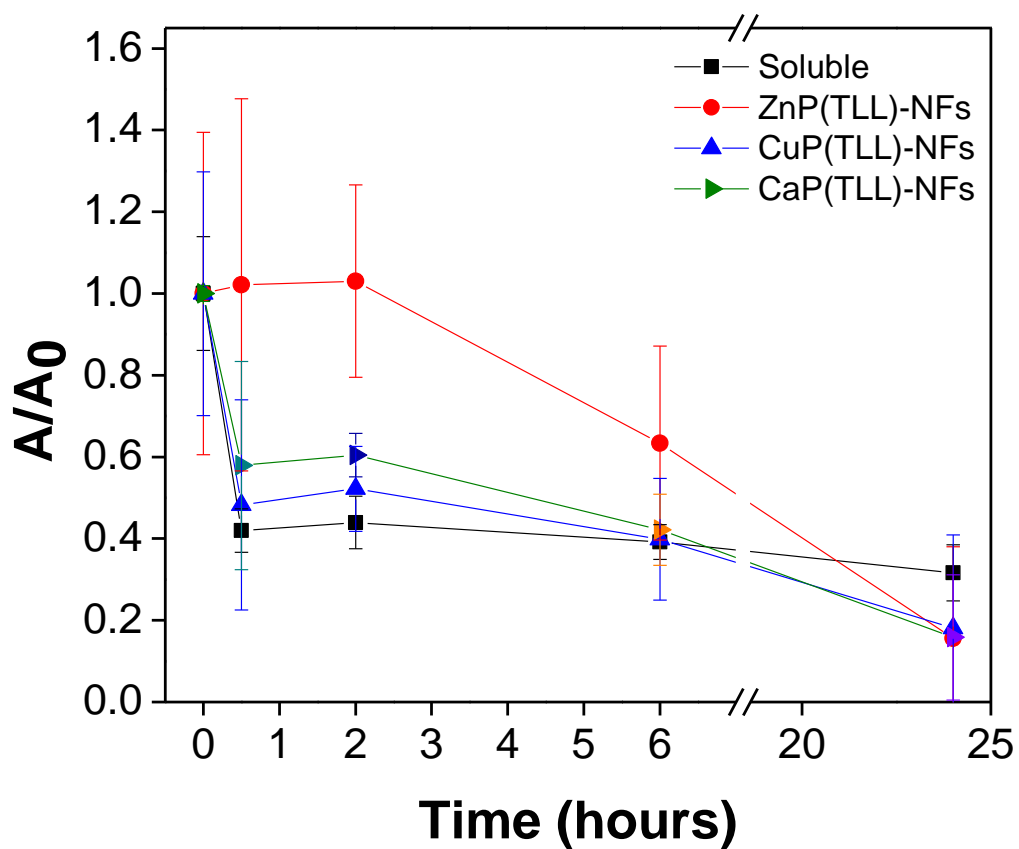

**Figure S5.** Thermal stability of TLL-nanoflowers at 65°C, pH 7 and phosphate buffer. The activity was monitored at different times using p-NPB as substrate

**Table S3. Thermal inactivation parameters of different preparations of TLL (soluble and NFs)**

| Biocatalyst  | Mechanism <sup>d</sup> | $t_{1/2}$ <sup>a</sup><br>(hours) | $R^2$ <sup>b</sup> | SF <sup>c</sup> |
|--------------|------------------------|-----------------------------------|--------------------|-----------------|
| Soluble      | first-order<br>Kinetic | 0.3                               | 1.00               | --              |
| ZnP(TLL)-NFs | first-order<br>Kinetic | 10.2                              | 0.99               | 34              |
| CaP(TLL)-NFs | Series-type            | 1.8                               | 0.90               | 6               |
| CuP(TLL)-NFs | Series-type            | 5.9                               | 0.93               | 20              |

a) Half-life ( $t_{1/2}$ ) values obtained by adjusting the experimental data to a classical first-order or series-type mechanism. b) The correlation coefficient ( $R^2$ ). c) The stabilization factor (SF) is shown in each case.  $t_{1/2}$  means the half-life of the enzyme activity incubated at 65°C and pH 7. d) The thermal inactivation along the time was fitted with two different inactivation mechanisms described by Henley et al.<sup>2,3</sup> according to the following equations.

First order Kinetic mechanism:

$$\frac{A}{A_0} = \exp(-k_1 * t)$$

Series-type mechanism:

$$\frac{A}{A_0} = \beta + \left\{ 1 + \alpha \frac{k_1}{(k_2 - k_1)} - \beta \frac{k_2}{k_2 - k_1} \right\} \exp(-k_1 * t) - \left\{ (\alpha - \beta) \left[ \frac{k_1}{(k_2 - k_1)} \right] \right\} \exp(-k_2 * t)$$

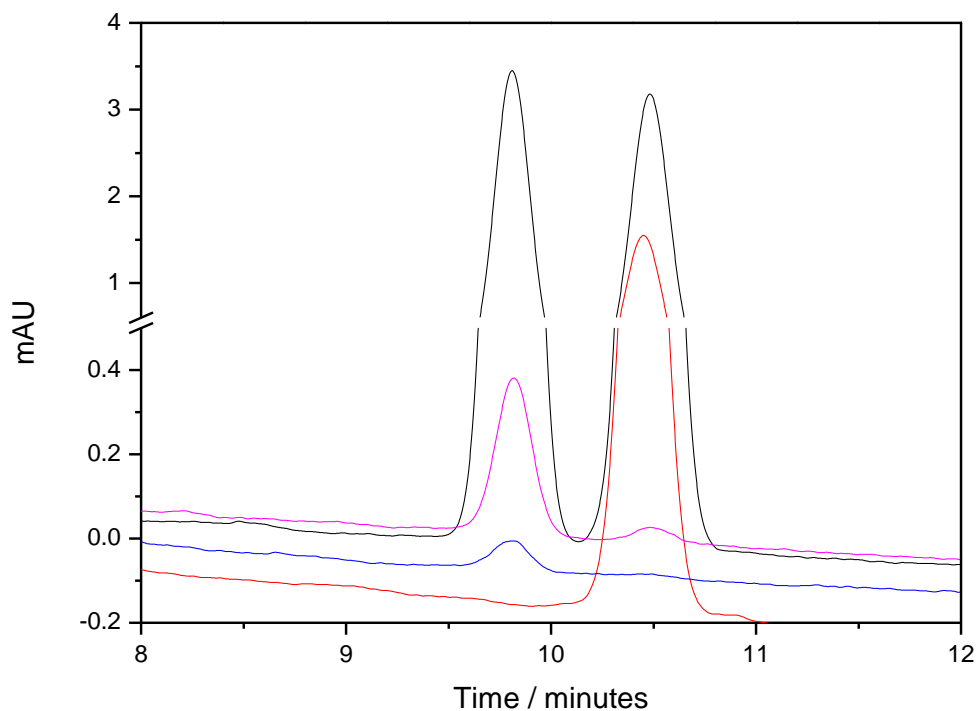

**Figure S6. Chromatograms of kinetic resolution of rac-1-phenylethyl acetate catalyzed by different preparations of TLL.** Standard of rac-1-phenyl ethanol (black). Standard of S-1-phenylethanol (red). Reaction catalyzed by ZnP(TLL)-NFs (purple). Reaction catalyzed by soluble TLL (blue).

## References

1. I. Walsh, G. Minervini, A. Corazza, G. Esposito, S. C. Tosatto and F. Fogolari, *Bioinformatics*, 2012, **28**, 2189-2190.
2. J. P. Henley and A. Sadana, *Enzyme and Microbial Technology*, 1985, **7**, 50-60.
3. J. P. Henley and A. Sadana, *Biotechnology and Bioengineering*, 1986, **28**, 1277-1285.
